# Supplementary material
Source: MDPI journal article supplement (https://www.mdpi.com/2227-9040/10/4/130)
Supplement: s1 [file s1]

## Supplementary Materials

### Contents:

|                                                                                                                                                                       |   |
|-----------------------------------------------------------------------------------------------------------------------------------------------------------------------|---|
| 1. Scheme of Oxygen saturation of Viburnum opulus L.(VO) microemulsion .....                                                                                          | 2 |
| 2. FTIR spectroscopy of microemulsion with Au nanoparticles and oxygen molecules .....                                                                                | 3 |
| 3. Size distribution and zeta potential results of gold nanoparticles .....                                                                                           | 4 |
| 4. Absorption and luminescence spectra of microemulsions with water-ethanol Viburnum opulus L. extract and gold nanoparticles (Au NPs) of various concentrations..... | 6 |
| 5. Study of antioxidant activity of Viburnum opulus L. extract with gold nanoparticles with various methods .....                                                     | 6 |
| 5.1. Determination of antioxidant activity by the amperometric method.....                                                                                            | 6 |
| 5.2. Determination of antioxidant activity by the spectrophotometry method (FRAP method).....                                                                         | 7 |
| 5.3.Determination of antioxidant activity by spectrophotometry method (DPPH method).....                                                                              | 7 |
| 5.4.Determination of antioxidant activity by spectrophotometry method (ABTS method).....                                                                              | 8 |

### 1. Scheme of oxygen saturation of the Viburnum opulus L. microemulsion

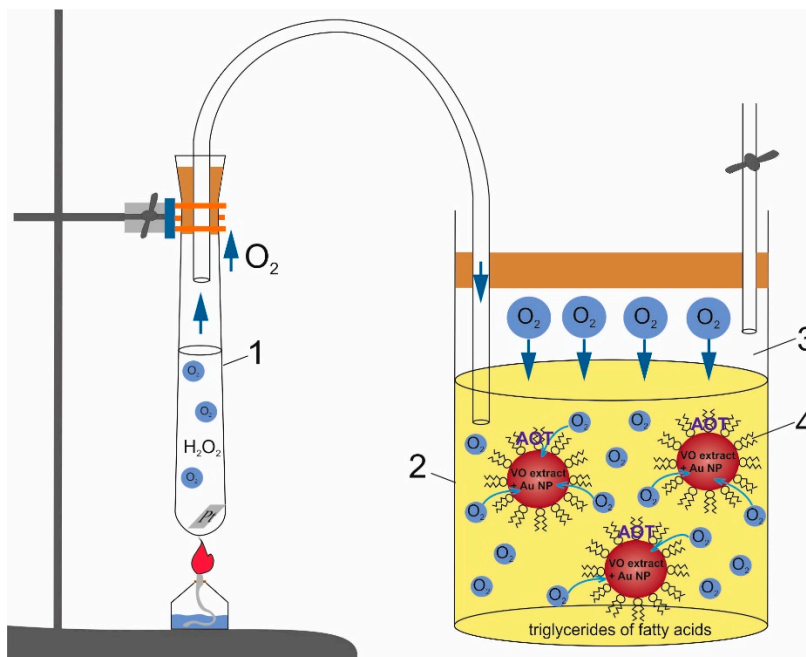

**Scheme S1.** The installation for oxygen generating and additional saturation of microemulsion (VO) with O<sub>2</sub>: 1—an oxygen generator (a glass tube with a H<sub>2</sub>O<sub>2</sub> solution and Pt plate); 2—a microemulsion with dissolved oxygen; 3—an air atmosphere with different partial pressure of O<sub>2</sub>; 4—an AOT micelle containing a water–Eth extract of a Viburnum opulus L.

Atmospheric oxygen dissolves in the oil microemulsion in accordance with Henry's law. Saturation of the microemulsion with oxygen was performed by increasing the partial pressure of oxygen over the surface of the emulsion. For this purpose, hydrogen peroxide decomposition was performed according to the equation

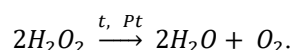

By applying Henry's law, the following system of equations can be written:

$$\left. \begin{array}{l} S_{\text{O}_2}^0 = kP_{\text{O}_2}^0 \\ S_{\text{O}_2} = kP_{\text{O}_2} \end{array} \right\} \Rightarrow \frac{S_{\text{O}_2}}{S_{\text{O}_2}^0} = \frac{P_{\text{O}_2}}{P_{\text{O}_2}^0},$$

where  $S_{\text{O}_2}^0$  and  $S_{\text{O}_2}$  are the solubility of oxygen in the microemulsion (initial and after additional oxygen saturation, respectively). By substituting the  $P_{\text{O}_2}$  and  $P_{\text{O}_2}^0$  values, we obtained  $S_{\text{O}_2}/S_{\text{O}_2}^0 = 4.7$ . Thus, the O<sub>2</sub> concentration in the microemulsion increased 4.7 times at the partial pressure of oxygen equal to atmospheric pressure. Assuming that  $S_{\text{O}_2}(\text{mic}) = tS_{\text{O}_2}(\text{oil})$ , where  $t$  is the coefficient of proportionality;  $S_{\text{O}_2}(\text{oil})$  denotes the oxygen solubility in oil; and  $S_{\text{O}_2}(\text{mic})$  is the oxygen solubility in micelle, where the last expression can be written as follows:

$$\frac{S_{\text{O}_2}(\text{mic})}{S_{\text{O}_2}^0(\text{mic})} = \frac{S_{\text{O}_2}(\text{oil})}{S_{\text{O}_2}^0(\text{oil})} \approx 4.7$$

Thus, the oxygen concentration in the micelle also increased 4.7 times and was  $C_1=2 \cdot 10^{-4}$  M at oxygen partial pressure equal to atmospheric pressure. Adjusting the partial pressure of  $O_2$  in the space above the microemulsion, different concentrations of oxygen in micelles were created. The oxygen pressure in the space above the emulsion was regulated by the reaction time ( $\tau$ ) and the oxygen concentration.  $C[O_2]$  grew linearly with an increase in pressure: at  $\tau_1 = 5$  min –  $p_1 = 0.25$  atm ( $C_1[O_2] = 2 \cdot 10^{-4}$  M); at  $\tau_2 = 7$  min –  $p_2 = 0.65$  atm ( $C_2[O_2] = 3.5 \cdot 10^{-4}$  M); and at  $\tau_1 = 12$  min –  $p_3 = 1$  atm ( $C_3[O_2] = 8.5 \cdot 10^{-4}$  M). The process of oxygen oversaturation of the microemulsion leads to the destruction of micelles and the precipitation of a pink sediment. This is due to oxidative processes leading to the destruction of double bonds in the triglycerides of fatty acids (oil).

## 2. FTIR spectroscopy of the microemulsion with Au nanoparticles and oxygen molecules

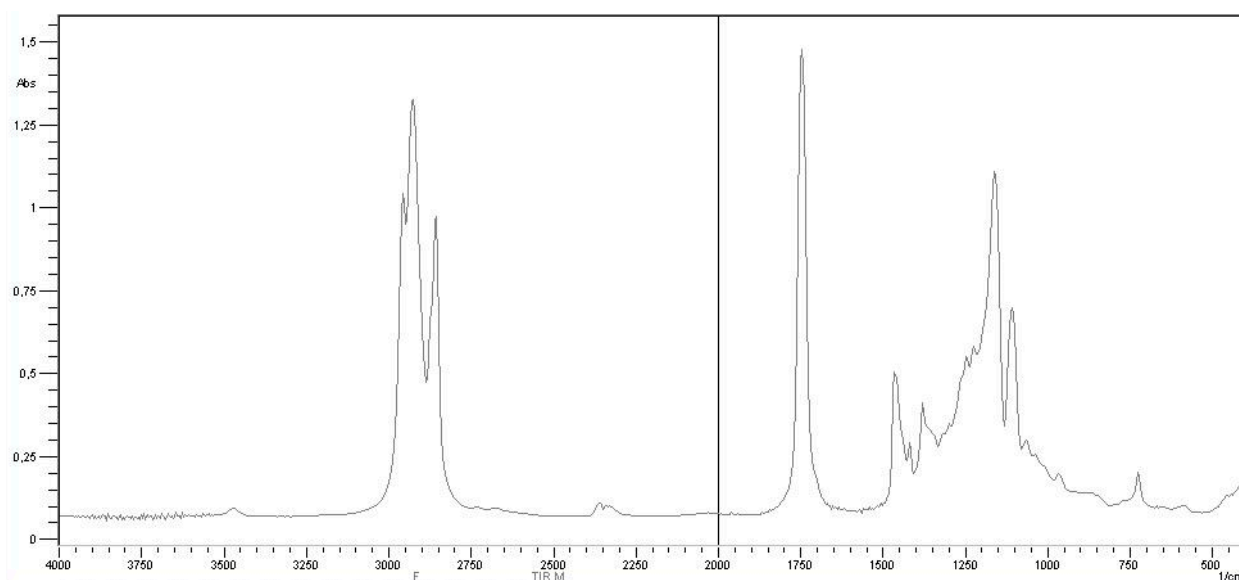

(a)

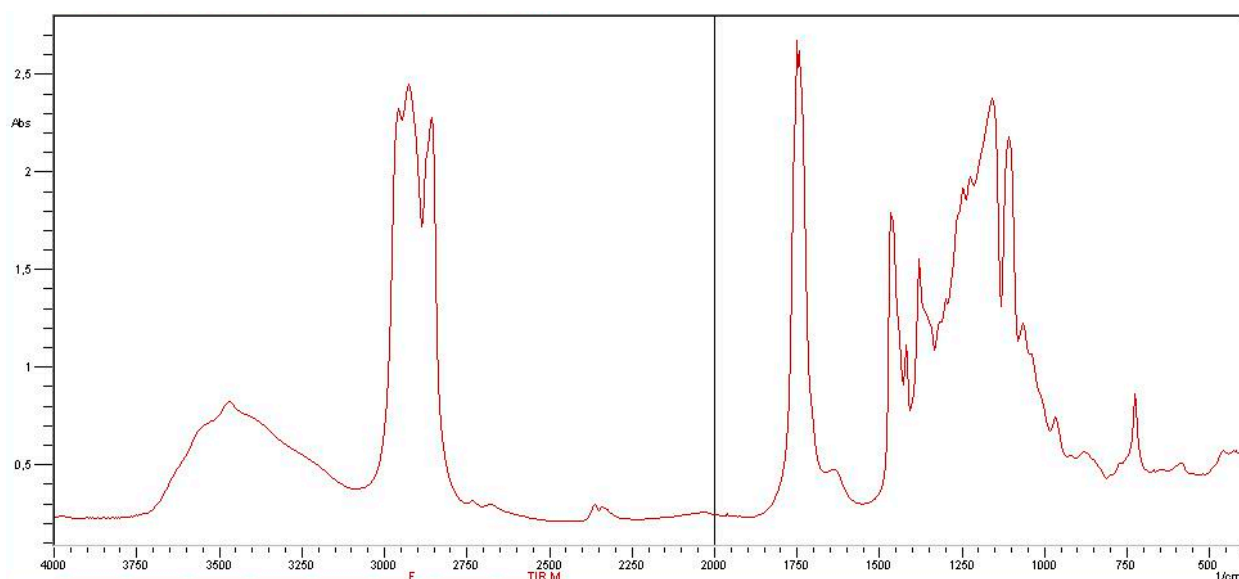

(b)

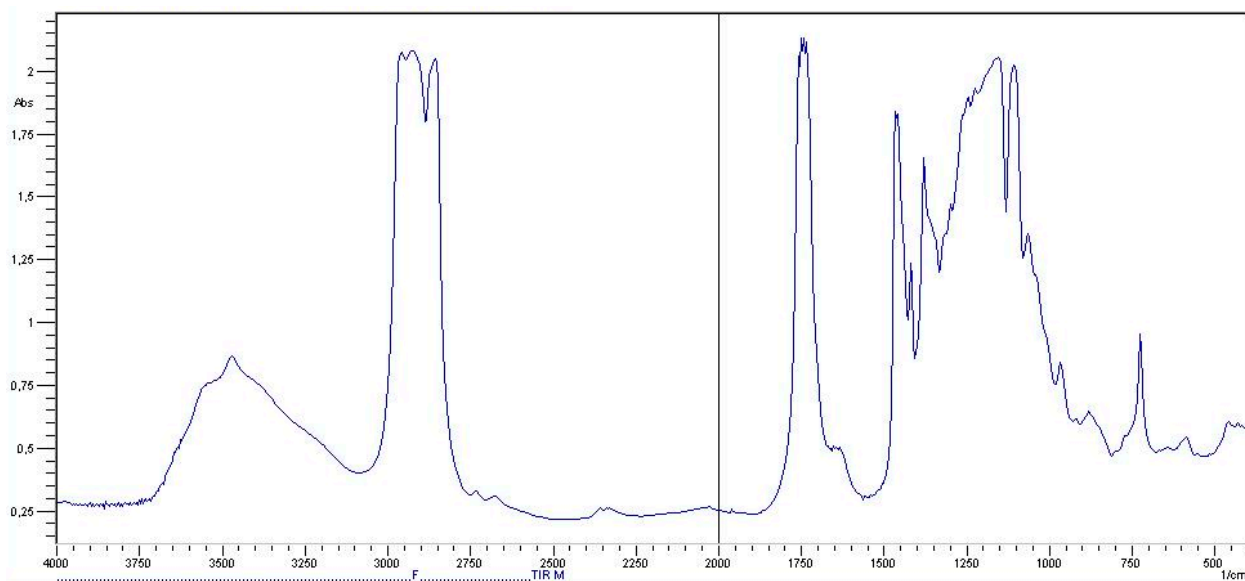

(c)

**Figure S1.** IR spectra: microemulsion without Au NPs (a); microemulsion with Au NPs (b); microemulsion with oxygen molecules (c).

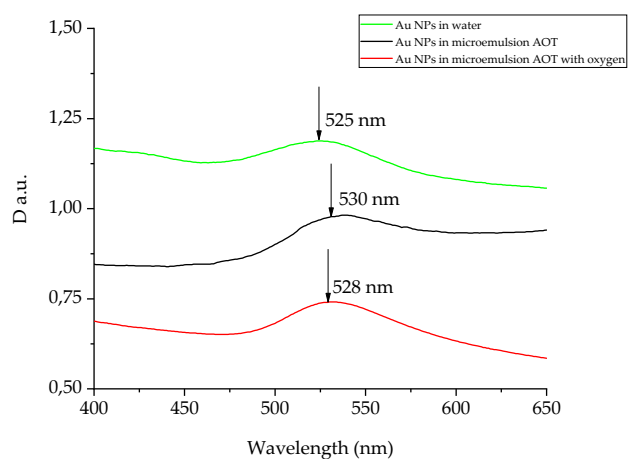

**Figure S2.** Absorption spectra: Au NPs in water solution; Au NPs in the microemulsion; Au NPs in the microemulsion with oxygen molecules.

### 3. Size distribution and zeta potential results of gold nanoparticles

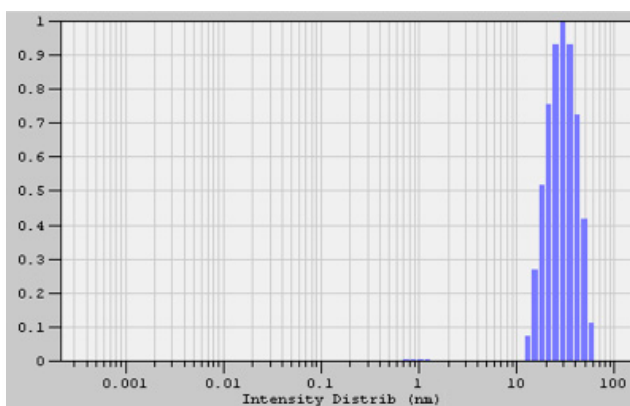

(a)

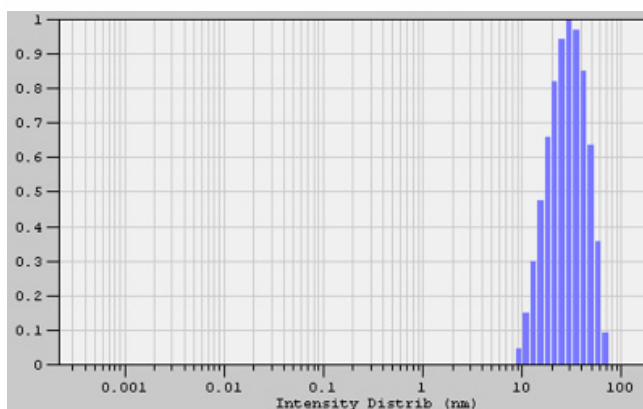

(b)

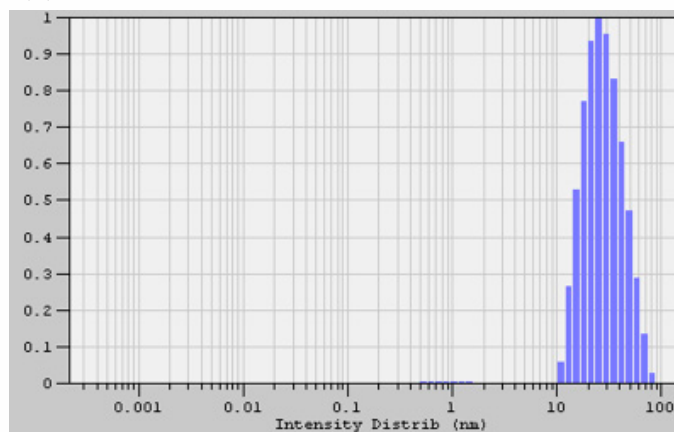

(c)

**Figure S3.** Size distribution of gold nanoparticles in water solution (a); in reverse micellar solution without oxygen molecules (b), and in reverse micellar solution with oxygen molecules (c).

As can be seen from Figure S2, the size distribution and the average hydrodynamic radius did not change in the microemulsion AOT and in the presence of oxygen molecules.

**Table S1.** The results of the size distribution and zeta-potential measurements.

| Sample                                                | R (nm)           | Z-potential (mV)  |
|-------------------------------------------------------|------------------|-------------------|
| Colloidal water solution of Au NPs                    | $30.27 \pm 0.17$ | $-15.65 \pm 0.11$ |
| Microemulsion AOT with Au NPs without $O_2$ molecules | $30.68 \pm 0.12$ | $-25.26 \pm 0.34$ |

|                                                                   |                  |                   |
|-------------------------------------------------------------------|------------------|-------------------|
| Microemulsion<br>AOT with Au NPs<br>with O <sub>2</sub> molecules | $28.86 \pm 0.14$ | $-22.88 \pm 0.47$ |
|-------------------------------------------------------------------|------------------|-------------------|

#### 4. Absorption and luminescence spectra of microemulsions with water–ethanol *Viburnum opulus* L. extract and gold nanoparticles of various concentrations

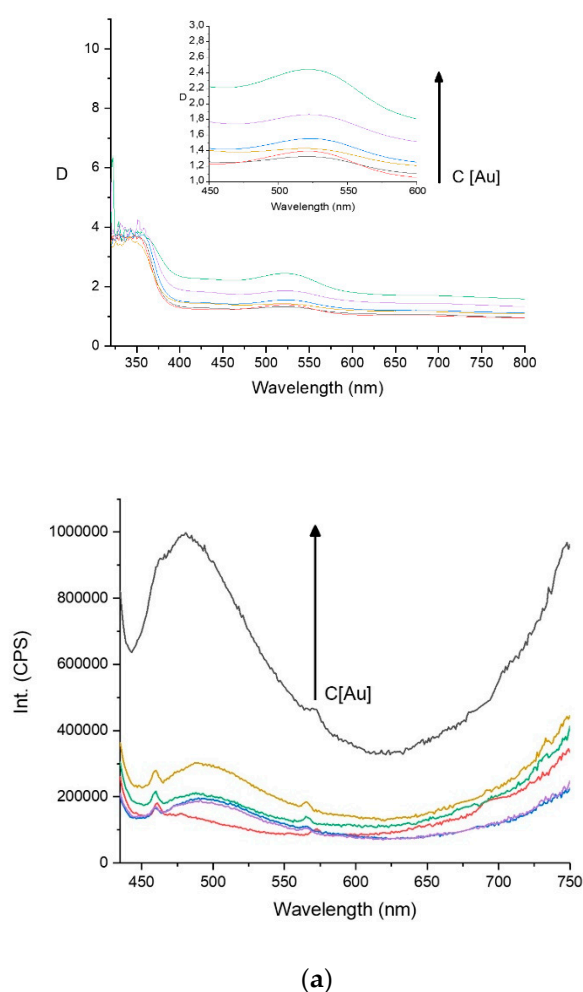

**Figure S4.** Absorption spectra (a) and luminescence spectra (b) of microemulsions with VO extract and gold nanoparticles of various concentrations. Au nanoparticle concentrations:  $C_1 = 1 \times 10^{-10}$ ,  $C_2 = 0.75 \times 10^{-10}$ ,  $C_3 = 0.5 \times 10^{-10}$ ,  $C_4 = 0.25 \times 10^{-10}$ ,  $C_5 = 0.125 \times 10^{-10}$  M. Excitation wavelength was 400 nm.

#### 5. Study of antioxidant activity of *Viburnum opulus* L. extract with gold nanoparticles

##### 5.1. Determination of antioxidant activity by the Amperometric Method

The antioxidant activity of the extracts was determined by means of a Tsvet-Yauza-01-AA (NPO Himavtomatika, Russia) unit. The amperometric method for measuring the mass concentration of antioxidants is based on measuring the electric current strength that occurs during the oxidation of antioxidant molecules on the surface of the electrode at a certain potential, which after amplification is converted into a digital signal. Operating parameters of the device: constant current mode (BP), the potential of the working electrode (Up)—(+1.3 V,

the rate of eluent supply (orthophosphoric acid solution with a molar concentration of 0.0022 mole/dm<sup>3</sup>) of the peristaltic pump—1.2 cm<sup>3</sup> / min.

The results are summarized in Table S2.

**Table S2.** The results of antioxidant activity obtained by amperometric method.

| Sample no. | Analytical signal (Peak area, nA*s) |                     |                                    |                                    |                               |
|------------|-------------------------------------|---------------------|------------------------------------|------------------------------------|-------------------------------|
|            | Sample                              |                     |                                    |                                    |                               |
|            | 1-NPs Au                            | 2-VO without NPs Au | 3-VO with Au NPs (C <sub>1</sub> ) | 4-VO with Au NPs (C <sub>2</sub> ) | 5-VO Au NPs (C <sub>3</sub> ) |
| 1          | 66                                  | 13,123              | 11,876                             | 12,508                             | 14,317                        |
| 2          | 58                                  | 12,866              | 11,872                             | 13,329                             | 13,083                        |
| 3          | 62                                  | 13,666              | 11,559                             | 12,997                             | 15,077                        |
| 4          | 61                                  | 13,829              | 11,619                             | 12,253                             | 15,257                        |
| 5          | 67                                  | 13,561              | 11,151                             | 11,811                             | 14,221                        |
| 6          | 57                                  | 12,525              | 14,957                             | 12,221                             | 1,3087                        |

Note: Au nanoparticle concentrations C<sub>1</sub> = 1×10<sup>-10</sup>, C<sub>2</sub> = 0.5×10<sup>-10</sup>, C<sub>3</sub> = 0.25×10<sup>-10</sup> M.

### 5.2. Determination of Antioxidant Activity by the Spectrophotometric Method (FRAP Method)

The method is based on the assessment of antioxidant activity by restoring power in the interaction of antioxidants with the Fe(III)-2,4,6-tripyridyl-5-triazine (FRAP) complex. To determine the regenerating power of the extracts, a freshly prepared FRAP reagent was used (prepared by mixing 10 parts of 0.3 M acetate buffer (pH 3.6), one part of a 10 mM solution of 2,4,6-tripyridyl-5-triazine in 40 mM HCl, and one part of an aqueous 20 mM solution of ferric chloride FeCl<sub>3</sub> × 6H<sub>2</sub>O). The reaction was started by mixing 300 mL of FRAP reagent and 20 mL of the studied extract. The time reaction was 10 minutes at 37 °C in the dark. The optical density was measured at 595 nm (CLARIOstar, BMG Labtech, Germany). The results are presented in Table S3.

**Table S3.** The results of antioxidant activity obtained by FRAP method.

| No sample | Optical density |                     |                                    |                                    |                                    |
|-----------|-----------------|---------------------|------------------------------------|------------------------------------|------------------------------------|
|           | Sample          |                     |                                    |                                    |                                    |
|           | 1- Au NPs       | 2-VO without Au NPs | 3-VO with Au NPs (C <sub>1</sub> ) | 4-VO with Au NPs (C <sub>2</sub> ) | 5-VO with Au NPs (C <sub>3</sub> ) |
| 1         | 0.028           | 0.337               | 0.359                              | 0.359                              | 0.345                              |
| 2         | 0.032           | 0.366               | 0.375                              | 0.347                              | 0.368                              |
| 3         | 0.03            | 0.383               | 0.396                              | 0.369                              | 0.378                              |
| 4         | 0.036           | 0.356               | 0.37                               | 0.375                              | 0.335                              |
| 5         | 0.025           | 0.346               | 0.367                              | 0.336                              | 0.341                              |
| 6         | 0.041           | 0.375               | 0.377                              | 0.356                              | 0.378                              |
| 7         | 0.026           | 0.35                | 0.382                              | 0.376                              | 0.378                              |

Note: Au nanoparticle concentrations C<sub>1</sub> = 1×10<sup>-10</sup>, C<sub>2</sub> = 0.5×10<sup>-10</sup>, C<sub>3</sub> = 0.25×10<sup>-10</sup> M.

### 5.3. Determination of Antioxidant Activity by the Spectrophotometry Method (DPPH Method)

The method is based on the ability of binding molecules of the reactive radical 2,2-diphenyl-1-picrylhydrazyl (DPH, DPPH) with antioxidants contained in the studied samples (VO extract solution with/without Au nanoparticles). Each portion of the extract ( $V = 20$  mL) was mixed with 300 mL of a freshly prepared 0.1 mM solution of 2,2-diphenyl-1-picrylhydrazyl (DPH, DPPH) in ethanol. The sample was incubated for 60 minutes at room temperature in the dark. The decrease in optical density at 515 nm was measured by the spectrophotometry method (CLARIOstar, BMG Labtech, Germany).

The results are presented in Table S4.

**Table S4.** The results of antioxidant activity obtained by the DPPH method.

|               | Optical density |                 |                            |                            |                            |
|---------------|-----------------|-----------------|----------------------------|----------------------------|----------------------------|
|               | Sample          |                 |                            |                            |                            |
| Repeatability | 1-Au NPs        | 2-VO without Au | 3-VO with Au NPs ( $C_1$ ) | 4-VO with Au NPs ( $C_2$ ) | 5-VO with Au NPs ( $C_3$ ) |
| 1             | 0.0295          | 0.2186          | 0.2416                     | 0.2346                     | 0.2256                     |
| 2             | 0.0261          | 0.2386          | 0.2326                     | 0.2246                     | 0.2426                     |
| 3             | 0.0231          | 0.2426          | 0.2256                     | 0.2336                     | 0.2586                     |
| 4             | 0.0171          | 0.2456          | 0.2416                     | 0.2236                     | 0.2016                     |
| 5             | 0.0311          | 0.2296          | 0.2236                     | 0.1886                     | 0.2126                     |
| 6             | 0.0231          | 0.2526          | 0.2166                     | 0.2226                     | 0.2276                     |
| 7             | 0.0211          | 0.2466          | 0.2396                     | 0.2306                     | 0.2196                     |
| 8             | 0.0321          | 0.2576          | 0.2576                     | 0.2306                     | 0.2356                     |

Note: Au nanoparticle concentrations  $C_1 = 1 \times 10^{-10}$ ,  $C_2 = 0.5 \times 10^{-10}$ ,  $C_3 = 0.25 \times 10^{-10}$  M.

#### 5.4. Determination of Antioxidant Activity by the Spectrophotometry Method (ABTS Method)

The method is based on the binding ability of molecules of the reactive radical ABTS (2,2'-azino-bis(3-ethylbenzthiazolino-6-sulfonic acid)). The ABTS radical was generated by mixing an aliquot of 2,2'-azino-bis(3-ethylbenzthiazolino-6-sulfonic acid (7.0 mM) and 2.45 mM solution of potassium persulfate. To carry out the reaction, the volume of 300  $\mu$ L of cation radical ABTS<sup>+</sup> was added to 20  $\mu$ L of the extract (VO with/without Au NPs). The optical density was measured at 730 nm after incubation of the mixture for 15 min at 37 °C in the dark (CLARIOstar, BMG Labtech, Germany). The results are presented in Table S5.

**Table S5.** The results of antioxidant activity obtained by the ABTS method.

|   | Optical density |                     |                            |                            |                            |
|---|-----------------|---------------------|----------------------------|----------------------------|----------------------------|
|   | Sample          |                     |                            |                            |                            |
| N | 1-Au NPs        | 2-VO without Au NPs | 3-VO with Au NPs ( $C_1$ ) | 4-VO with Au NPs ( $C_2$ ) | 5-VO with Au NPs ( $C_3$ ) |
| 1 | 0.004           | 0.3508              | 0.3408                     | 0.3048                     | 0.2918                     |
| 2 | 0.002           | 0.3398              | 0.3578                     | 0.3458                     | 0.3018                     |
| 3 | 0.001           | 0.3588              | 0.3588                     | 0.3198                     | 0.3158                     |
| 4 | 0.004           | 0.3198              | 0.3268                     | 0.2948                     | 0.3388                     |
| 5 | 0.005           | 0.3228              | 0.3428                     | 0.2988                     | 0.2658                     |
| 6 | 0.002           | 0.3478              | 0.2998                     | 0.3088                     | 0.3018                     |
| 7 | 0.003           | 0.3618              | 0.3208                     | 0.2968                     | 0.3148                     |



|   |       |        |        |        |        |
|---|-------|--------|--------|--------|--------|
| 8 | 0.002 | 0.3748 | 0.3798 | 0.3298 | 0.2988 |
|---|-------|--------|--------|--------|--------|

Note: Au nanoparticle concentrations  $C_1 = 1 \times 10^{-10}$ ,  $C_2 = 0.5 \times 10^{-10}$ ,  $C_3 = 0.25 \times 10^{-10}$  M.

Based on the data presented in Tables S2–S5 it can be concluded that the water–ethanol extract of *Viburnum opulus* L. has an antioxidant activity and can form contact complexes with oxygen molecules ( $O_2$ ). At the same time, the antioxidant activity of the extract can be increased or decreased depending on the concentration of gold nanoparticles in the solution.
